# Supplementary material
Source: Springer Nature journal article supplement (https://www.springermedizin.de/resource/supplementary/12950_2011_238_MOESM2_ESM.pdf/9558278)

### IGF-1 vs Age

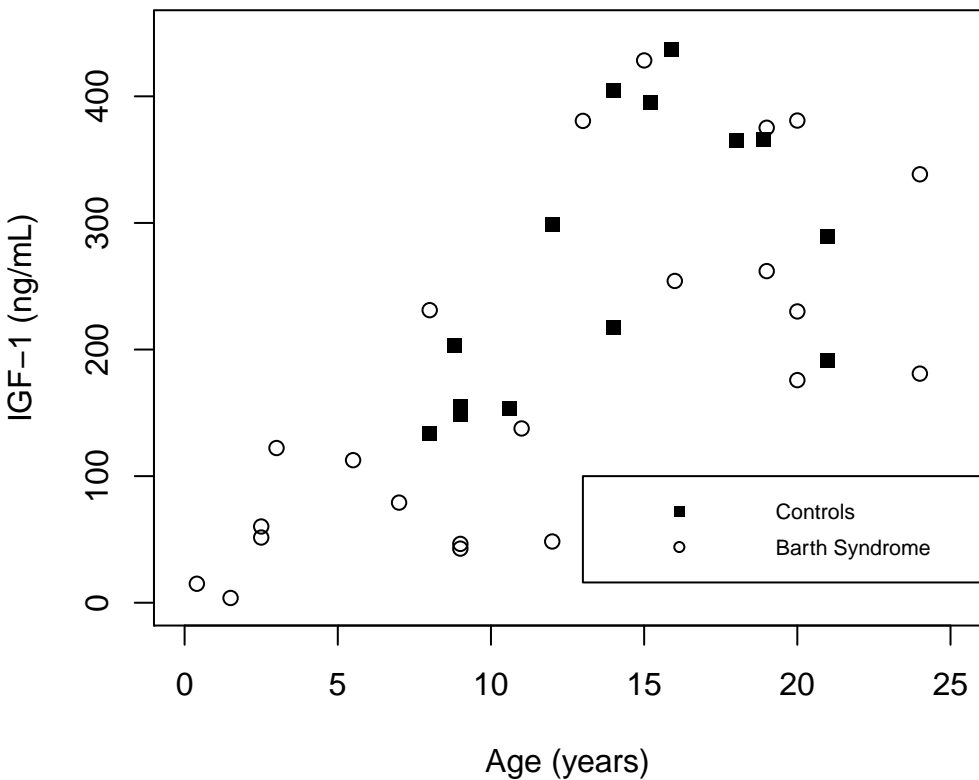

### IGF-1 vs Height

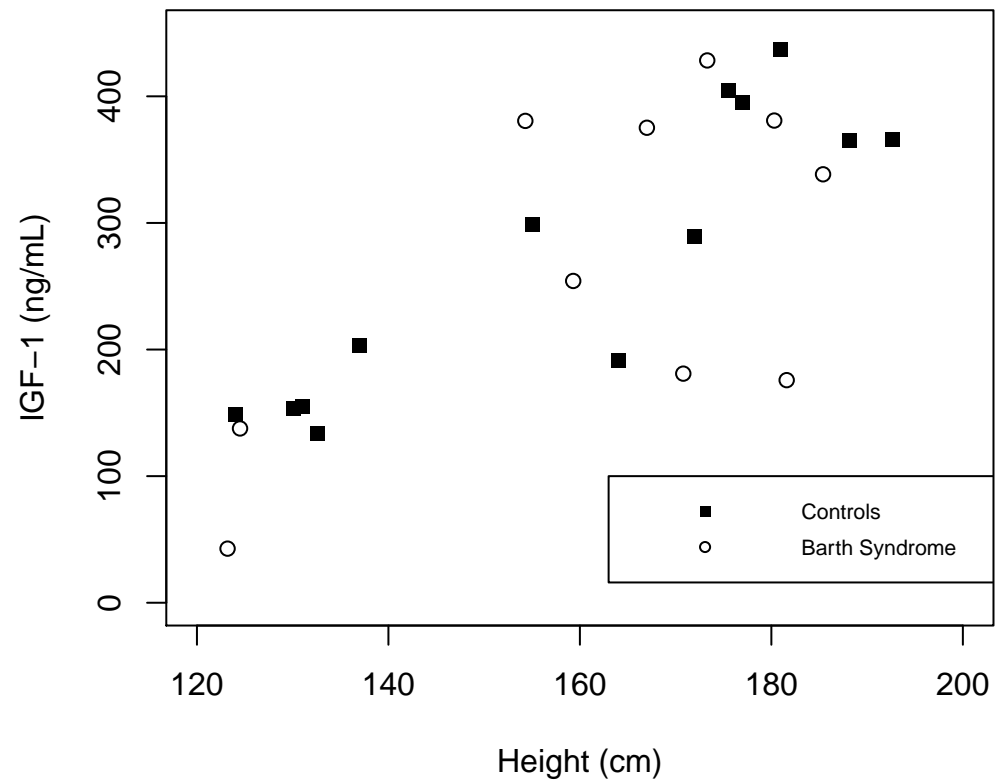

Supplement: MOESM2 [file 9558278]
